Correction

# Correction: Estimating Species Richness and Modelling Habitat Preferences of Tropical Forest Mammals from Camera Trap Data

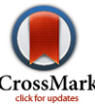

## The PLOS ONE Staff

In the Acknowledgements section, the following information is missing: All data in this paper were provided by the TEAM Network, a partnership between Conservation International, The Missouri Botanical Garden, The Smithsonian Institution and The Wildlife Conservation Society.

## Reference

1. Rovero F, Martin E, Rosa M, Ahumada JA, Spitalé D (2014) Estimating Species Richness and Modelling Habitat Preferences of Tropical Forest Mammals from Camera Trap Data. PLoS ONE 9(7): e103300. doi:10.1371/journal.pone.0103300

**Citation:** The PLOS ONE Staff (2014) Correction: Estimating Species Richness and Modelling Habitat Preferences of Tropical Forest Mammals from Camera Trap Data. PLoS ONE 9(10): e110971. doi:10.1371/journal.pone.0110971

**Published:** October 13, 2014

**Copyright:** © 2014 The PLOS ONE Staff. This is an open-access article distributed under the terms of the Creative Commons Attribution License, which permits unrestricted use, distribution, and reproduction in any medium, provided the original author and source are credited.
